# Supplementary material for: Next generation amino acid technology for CO2 capture
Source: Royal Society of Chemistry journal article supplement (doi:10.1039/d0ta10583j), 2020-12-20
Supplement: d0ta10583j1.pdf [file d0ta10583j1.pdf]

## Supporting Information

### Next generation amino acid technology for CO<sub>2</sub> capture

Xingguang Xu, <sup>\*a, b</sup> Matthew B. Myers, <sup>b</sup> Friso G. Versteeg <sup>b, c</sup>, Ethan Adam, <sup>b</sup>  
Cameron White, <sup>b</sup> Emma Crooke <sup>b</sup> and Colin D. Wood <sup>\*b, d</sup>

\*Corresponding authors

<sup>a</sup> Key Laboratory of Tectonics and Petroleum Resources, Ministry of Education, China  
University of Geosciences (Wuhan), Wuhan 430074, China.

*Email:* [xuxingguang@cug.edu.cn](mailto:xuxingguang@cug.edu.cn)

<sup>b</sup> Energy Business Unit, Commonwealth Scientific Industrial Research Organisation  
(CSIRO), Kensington WA 6151, Australia.

*Email:* [Colin.Wood@csiro.au](mailto:Colin.Wood@csiro.au)

<sup>c</sup> Faculty of Science and Engineering, University of Groningen, 9747 AG Groningen,  
The Netherlands

<sup>d</sup> Curtin University of Science and Technology, Curtin Oil and Gas Innovation Centre  
(CUOGIC), Kensington WA 6151, Australia

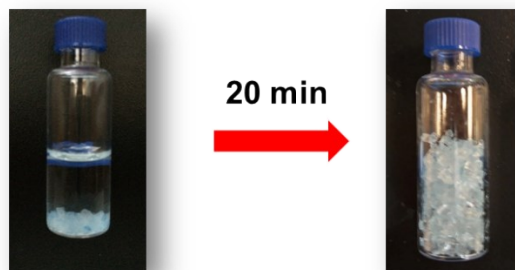

**Fig. S1.** Illustration of formation of PSA-LAHPs (0.2g hydrogel in 1.0 g potassium sarcosinate solution with a mass concentration of 30.0 wt.%)

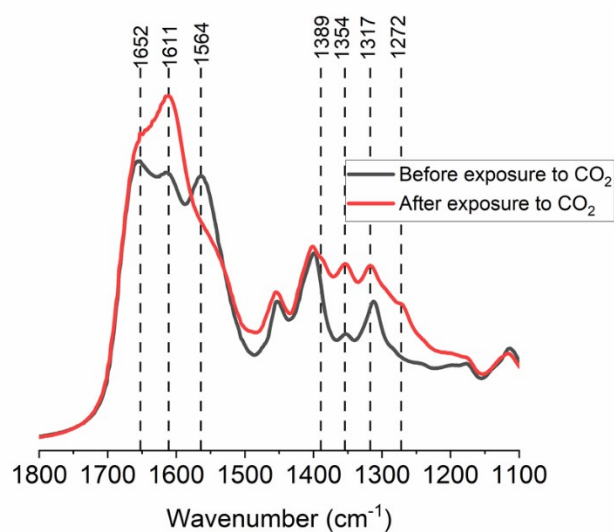

**Fig. S2.** FTIR spectrum of PSA-LAHPs before and after exposure to CO<sub>2</sub> (30.0 wt.% potassium sarcosinate)

The FTIR spectra in Fig. S2 shows clear differences before and after CO<sub>2</sub> exposure that provide evidence for the formation of carbamate species with a minor amount of hydrolysis leading to carbonate species upon sorption. The increase in the symmetric carbonyl bands at 1272 and 1317 cm<sup>-1</sup> is indicative of a carbonate species. The peaks at 1652 cm<sup>-1</sup> increasing and at 1564 cm<sup>-1</sup> diminishing is consistent with the formation of a carbamate species while the increase in intensity at 1636 cm<sup>-1</sup> is consistent with formation of a bicarbonate species (which could result from hydrolysis of the carbamate species with water present in the hydrogel).

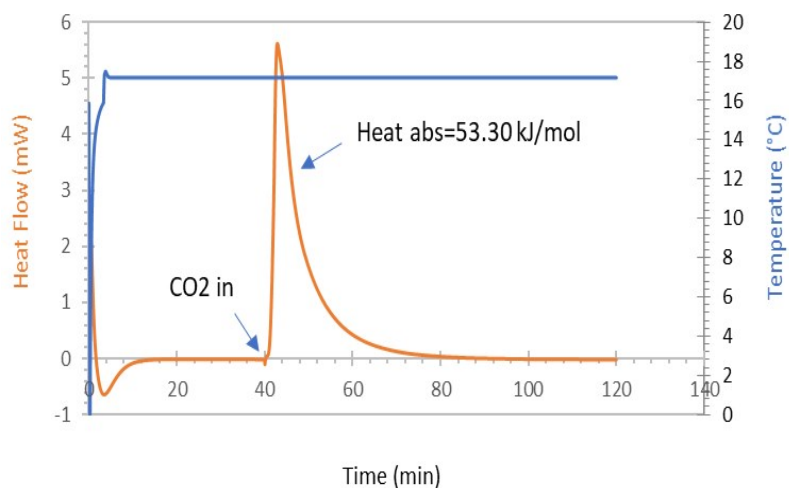

**Fig. S3.** DSC of PSA-LAHPs upon CO<sub>2</sub> absorption (potassium sarcosinate 30.0 wt.%)

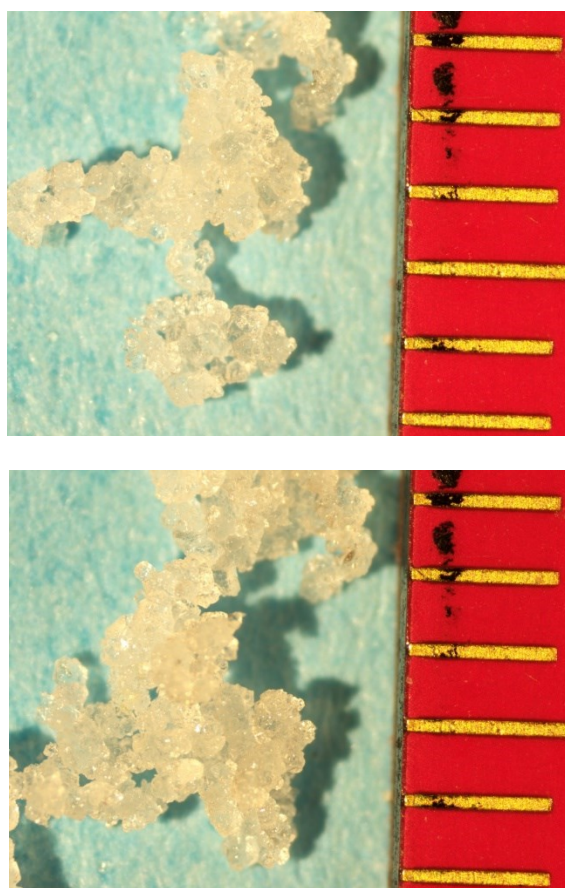

**Fig. S4.** Microscope images (top: before exposure to CO<sub>2</sub>, bottom: after exposure to CO<sub>2</sub>) of 30 wt.% potassium sarcosinate in ethylene glycol swelled in cross-linked PHEAA (2:1 liquid:solid ratio). Spacing between lines on ruler is 1 mm.

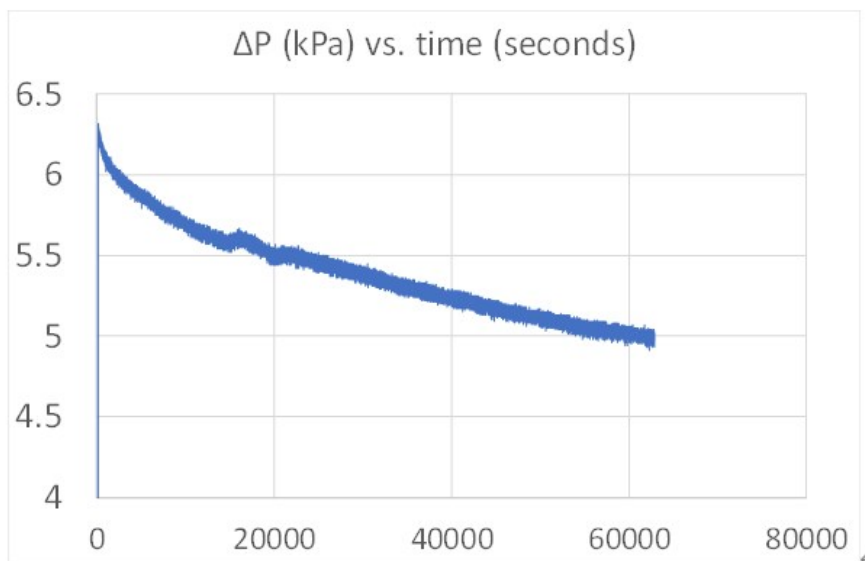

**Fig. S5.** Pressure differential data (as determined by Licor Li-840a analyzers) for 30 wt.% potassium sarcosinate in ethylene glycol swelled in cross-linked PHEAA (2:1 liquid:solid ratio). The column is 10 cm in length and has an ID of 10.22 mm (resulting in a cross-sectional area of 0.82 cm<sup>2</sup>). The air flow rate is 500 std. cm<sup>3</sup>/min and the viscosity of air is approximately 0.018 cP under these conditions.

**Table S1.** IR peak assignments of CO<sub>2</sub> absorption by PSA-LAHPs (potassium sarcosinate 30.0 wt.%)

|      |                                                                                                                         |
|------|-------------------------------------------------------------------------------------------------------------------------|
| 1652 | Asymmetric carbonyl bands of -OCO <sub>2</sub> <sup>-</sup> <sub>1</sub>                                                |
| 1611 | -NH bending vibration <sup>2</sup>                                                                                      |
| 1564 | -NH stretching <sup>3, 4</sup>                                                                                          |
| 1389 | Symmetric carbonyl bands of -OCO <sub>2</sub> <sup>-</sup> <sub>4</sub>                                                 |
| 1354 | C-O stretch (from carbonate/bicarbonate) <sup>5</sup>                                                                   |
| 1317 | NH <sub>3</sub> <sup>+</sup> deformation, symmetric carbonyl bands of -OCO <sub>2</sub> <sup>-</sup> <sub>1, 6, 7</sub> |
| 1272 | Symmetric carbonyl bands of -OCO <sub>2</sub> <sup>-</sup> <sub>1</sub>                                                 |

**Table S2.** Variation in uptake with 30 wt.% potassium sarcosinate swelled in cross-linked PHEAA hydrogel

| Trial # | Pure CO <sub>2</sub> uptake (wt. %) |
|---------|-------------------------------------|
| 1       | 4.29                                |
| 2       | 3.52                                |
| 3       | 3.92                                |
| 4       | 3.59                                |
| 5       | 3.58                                |
| 6       | 3.55                                |
| 7       | 3.53                                |
| 8       | 3.57                                |
| 9       | 3.54                                |
| 10      | 3.53                                |
| 11      | 3.55                                |

**Table S3.** CO<sub>2</sub> uptakes of LAHPs and some of the existing absorbents/adsorbents

| No. | Material                                             | Method              | CO <sub>2</sub> uptake (mg/g) |                            |      | Reference |
|-----|------------------------------------------------------|---------------------|-------------------------------|----------------------------|------|-----------|
|     |                                                      |                     | Pure CO <sub>2</sub>          | 15.0 vol.% CO <sub>2</sub> | Air  |           |
| 1   | LAHPs                                                | Chemical absorption | 72.9                          | 62.8                       | 42.4 | This work |
| 2   | K <sub>2</sub> CO <sub>3</sub> solution (30.0 wt. %) | Chemical absorption | 39.6                          |                            |      | 8         |
| 3   | MEA solution (30.0 wt. %)                            | Chemical absorption | 103.1                         |                            |      | 9         |
| 4   | TEA solution (30.0 wt. %)                            | Chemical absorption | 54.7                          |                            |      | 9         |
| 5   | ppg[Tf2N] (ionic liquid)                             | Physical absorption | 96.3                          |                            |      | 10        |
| 6   | Jeffamine /nano-silica                               | Chemical adsorption | 78.3                          |                            |      | 11        |
| 7   | TEPA /meso-silica                                    | Chemical adsorption | 154.1                         |                            |      | 12        |
| 8   | [Mg <sub>2</sub> (dobdc)] (MOFs)                     | Chemical adsorption | 236.5                         |                            |      | 13        |
| 9   | β-Zeolite                                            | Physical adsorption | 53.2                          |                            |      | 14        |
| 10  | TEA solution                                         | Chemical            |                               | 50.8                       |      | 15        |

|    |                                                            |                        |  |              |             |    |
|----|------------------------------------------------------------|------------------------|--|--------------|-------------|----|
|    | (30.0 wt. %)                                               | absorption             |  |              |             |    |
| 11 | PEI<br>/MCM-41                                             | Chemical<br>absorption |  | <b>89.1</b>  |             | 16 |
| 12 | 2N-APS<br>/SBA-15                                          | Chemical<br>absorption |  | <b>60.4</b>  |             | 17 |
| 13 | mmen-CuBTTr<br>(MOFs)                                      | Chemical<br>adsorption |  | <b>105.6</b> |             | 18 |
| 14 | [NH <sub>2</sub> emim][BF <sub>4</sub> ]<br>(Ionic liquid) | Physical<br>absorption |  | <b>61.3</b>  |             | 19 |
| 15 | PEI<br>/fumed silica                                       | Chemical<br>absorption |  |              | <b>73.0</b> | 20 |
| 16 | HAS polymer<br>brush                                       | Chemical<br>adsorption |  |              | <b>74.8</b> | 21 |
| 17 | PET<br>/dolomite                                           | Chemical<br>absorption |  |              | <b>22.3</b> | 22 |
| 18 | Al-PEI 35                                                  | Chemical<br>absorption |  |              | <b>45.3</b> | 23 |
| 19 | Mg <sub>2</sub> (dobpdc)<br>(MOFs)                         | Chemical<br>adsorption |  |              | <b>93.5</b> | 24 |
| 20 | PAA<br>/MCF                                                | Chemical<br>adsorption |  |              | <b>37.8</b> | 25 |

## Notes and references

1. Im, J.; Hong, S. Y.; Cheon, Y.; Lee, J.; Lee, J. S.; Kim, H. S.; Cheong, M.; Park, H., Steric hindrance-induced zwitterionic carbonates from alkanolamines and CO<sub>2</sub>: highly efficient CO<sub>2</sub> absorbents. *Energy & Environmental Science* **2011**, *4* (10), 4284-4289.
2. Xu, X; Pejcic, B.; Heath, C.; Wood, C. D., Carbon capture with polyethylenimine hydrogel beads (PEI HBs). *Journal of Materials Chemistry A* **2018**, *6* (43), 21468-21474.
3. Pavia, D. L.; Lampman, G. M.; Kriz, G. S.; Vyvyan, J. R.; Lin, T. C., *Introduction to Spectroscopy*. Cengage Learning Asia Pte. Limited: 2015.
4. Yang, D. Z.; Lv, M.; Chen, J., Efficient non-aqueous solvent formed by 2-piperidineethanol and ethylene glycol for CO<sub>2</sub> absorption. *Chemical Communications* **2019**, *55* (83), 12483-12486.
5. Jackson, P.; Robinson, K.; Puxty, G.; Attalla, M., In situ Fourier Transform-Infrared (FT-IR) analysis of carbon dioxide absorption and desorption in amine solutions. *Energy Procedia* **2009**, *1* (1), 985-994.
6. Frasco, D. L., Infrared Spectra of Ammonium Carbamate and Deuteroammonium

- Carbamate. *The Journal of Chemical Physics* **1964**, *41* (7), 2134-2140.
7. Xu, X.; Heath, C.; Pejcic, B.; Wood, C. D., CO<sub>2</sub> capture by amine infused hydrogels (AIHs). *Journal of Materials Chemistry A* **2018**, *6* (11), 4829-4838.
  8. Dawson, R.; Stevens, L. A.; Williams, O. S. A.; Wang, W.; Carter, B. O.; Sutton, S.; Drag, T. C.; Blanc, F.; Adam, D. J.; Cooper, A. I., 'Dry bases': carbon dioxide capture using alkaline dry water. *Energy Environment Science*, **2014**, *7*, 1786-1791
  9. Kim, Y. E.; Lim, J. A.; Jeong, S. K.; Yoon, Y.; Bae, S. T.; Nam, S. C., Comparison of carbon dioxide absorption in aqueous MEA, DEA, TEA and AMP solutions. *Bulletin of the Korean Chemical Society*, **2013**, *34*, 783-787
  10. Maiti, A., Theoretical screening of ionic liquid solvents for carbon capture. *ChemSusChem*, **2009**, *2*, 628-631.
  11. Al-Azzawi, O. M.; Hofmann, C. M.; Baker, G. A.; Baker, S. N., Nanosilica-supported polyethoxyamines as low-cost, reversible carbon dioxide sorbents, *Journal of Colloid and Interface Science*, **2012**, *385*, 154-159.
  12. Zhao, A.; Samanta, A.; Sarkar, P.; Gupta, R., Carbon dioxide adsorption on amine-impregnated mesoporous SBA-15 sorbents: Experimental and kinetics study. *Ind. Eng. Chem. Res.* **2013**, *52*, 6480-6491.
  13. D'Alessandro, D. M.; Smit, B.; Long, J. R., Carbon dioxide capture: Prospects for new materials, *Angewandte Chemie International Edition*, **2010**, *49*, 6058-6082.
  14. Xu, X.; Zhao, X.; Sun, L.; Liu, X., Adsorption separation of carbon dioxide, methane and nitrogen on monoethanol amine modified  $\beta$ -zeolite, *Journal of Natural Gas Chemistry*, **2009**, *18*, 167-172.
  15. Hadri, N. E.; Quang, D. V.; Abu-Zahra, M. R. M., Study of novel solvent for CO<sub>2</sub> post-combustion capture, *Energy Procedia*, **2015**, *75*, 2268 - 2286.
  16. Xu, X.; Song, C.; Miller, B.G.; Scaroni, A.W., Influence of moisture on CO<sub>2</sub> separation from gas mixture by a nanoporous adsorbent based on polyethylenimine-modified molecular sieve MCM-41. *Industrial Engineering Chemistry Research*, **2005**, *44*, 8113-8119.
  17. Hiyoshi, N.; Yogo, K.; Yashima, T., Adsorption characteristics of carbon dioxide on organically functionalized SBA-15. *Microporous and Mesoporous Materials*, **2005**, *84*, 357-365.
  18. McDonald, T. M.; D'Alessandro, D. M.; Krishna, R.; Long, J. R., Enhanced carbon dioxide capture upon incorporation of N,N'-dimethylethylenediamine in the metal-organic framework CuBTTri, *Chemical Science*, **2011**, *2*, 2022-2028.
  19. Wu, G.; Liu, Y.; Liu, G.; Pang, X., The CO<sub>2</sub> absorption in flue gas using mixed ionic liquids, *Molecules*, **2020**, *25*, 1034
  20. Goepfert, A.; Czaun, M.; May, R. B.; Surya Prakash, G. K.; Olah, G. A.; Narayanan, S. R., Carbon dioxide capture from the air using a polyamine based regenerable solid adsorbent, *Journal of the American Chemical Society*, **2011**, *133*,

20164-20167.

21. Choi, S.; Drese, J. H.; Eisenberger, P. M.; Jones, C. W., Application of amine-tethered solid sorbents for direct CO<sub>2</sub> capture from the ambient air, *Environmental Science & Technology*, **2011**, *45*, 2420–2427.
22. Przepiorski, J.; Czyzewski, A.; Pietrzak, R.; Morawski, A. W., MgO/CaO-loaded activated carbon for carbon dioxide capture: Practical aspects of use, *Industrial & Engineering Chemistry Research*, **2013**, *52*, 6669-6677.
23. Bali, S.; Sakwa-Novak, M. A.; Jones, C. W., Potassium incorporated alumina-based CO<sub>2</sub> capture sorbents: Comparison with supported amine sorbents under ultra-dilute capture conditions, *Colloids and Surfaces, A: Physicochemical and Engineering Aspects*, 2015, *486*, 78-85.
24. McDonald, T. M.; Lee, W. R.; Mason, J. A.; Wiers, B. M.; Hong, C. S.; Long, J. R., Capture of carbon dioxide from air and flue Gas in the alkylamine-appended metal-organic framework mmen-Mg<sub>2</sub>(dobpdc), *Journal of the American Chemical Society* **2012**, *134*, 7056-7065.
25. Chaikittisilp, W.; Khunsupat, R.; Chen, T. T.; Jones, C. W., Poly(allylamine)-mesoporous silica composite materials for CO<sub>2</sub> capture from simulated flue gas or ambient air, *Industrial & Engineering Chemistry Research*, 2011, *50*, 14203-14210.
